# Supplementary material for: Zinc-electrocatalyzed hydrogenation of furfural in near-neutral electrolytes
Source: Royal Society of Chemistry journal article supplement (doi:10.1039/d1se00221j), 2021-01-01
Supplement: d1se00221j1.pdf [file d1se00221j1.pdf]

## Supporting Information

# Zinc-Electrocatalyzed Hydrogenation of Furfural in Near-Neutral Electrolytes

Manali S. Dhawan,<sup>†</sup> Ganapati D. Yadav,<sup>‡</sup> and Scott Calabrese Barton<sup>\*,†</sup>

<sup>‡</sup>*Department of Chemical Engineering, Institute of Chemical Technology, Nathalal Parekh Marg, Matunga, Mumbai 400019, India*

*E-mail: gdyadav@yahoo.com*

<sup>\*,†</sup>*Department of Chemical Engineering and Material Science, Michigan State University, East Lansing, Michigan 48824, United States*

*Telephone: 5175759393, E-mail: scb@msu.edu*

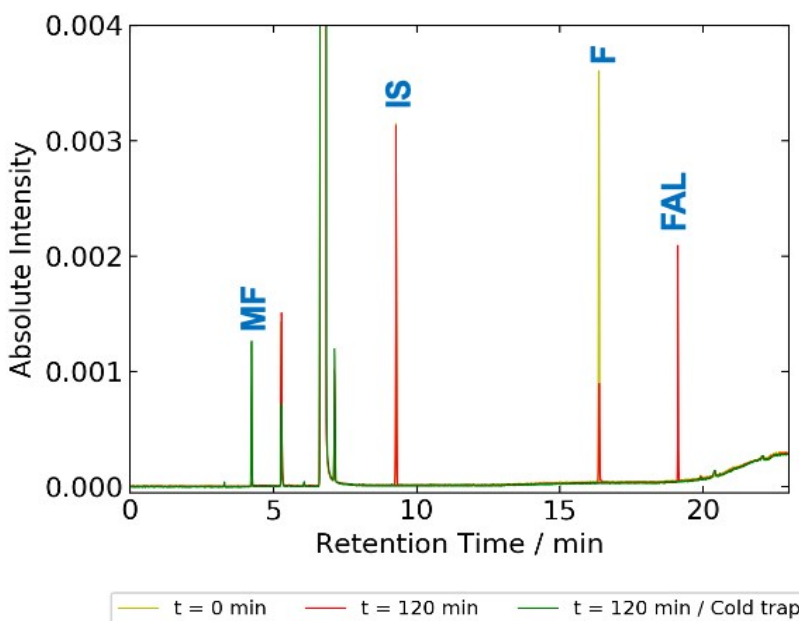

**Figure S1.** GC chromatogram of reaction mixture containing furfural (F); furfuryl alcohol (FAL), 2-methylfuran (MF), p-xylene (internal standard, IS).

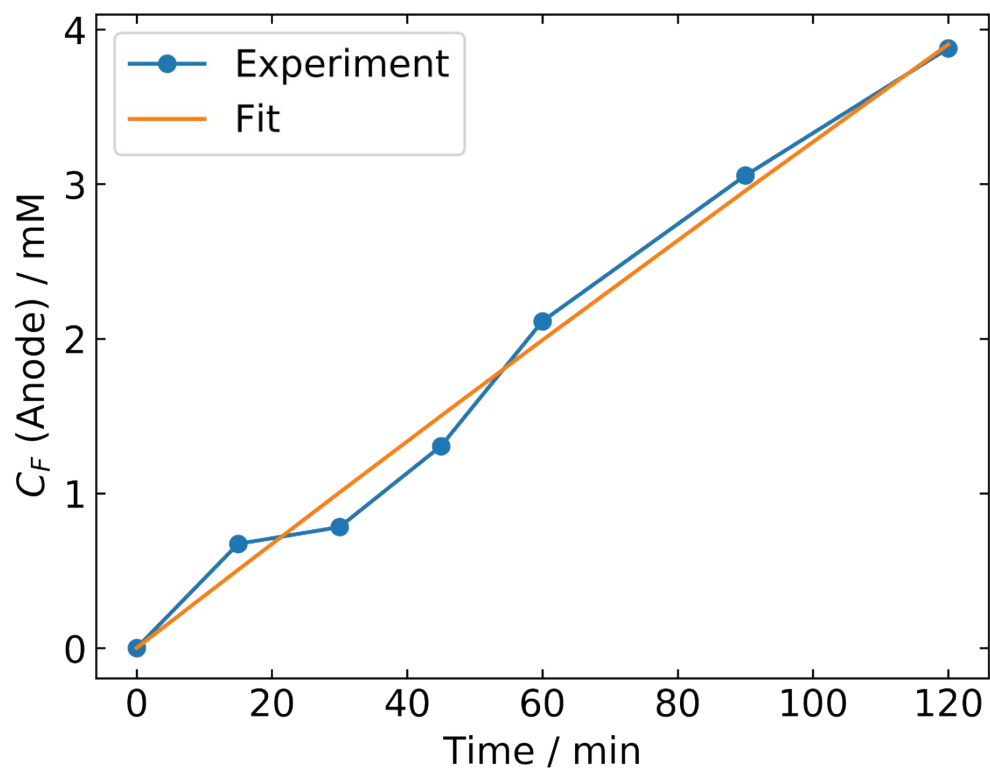

**Figure S2.** Experimental (Exp.) and fitted (Fit) concentration profile of furfural in anode chamber after permeation

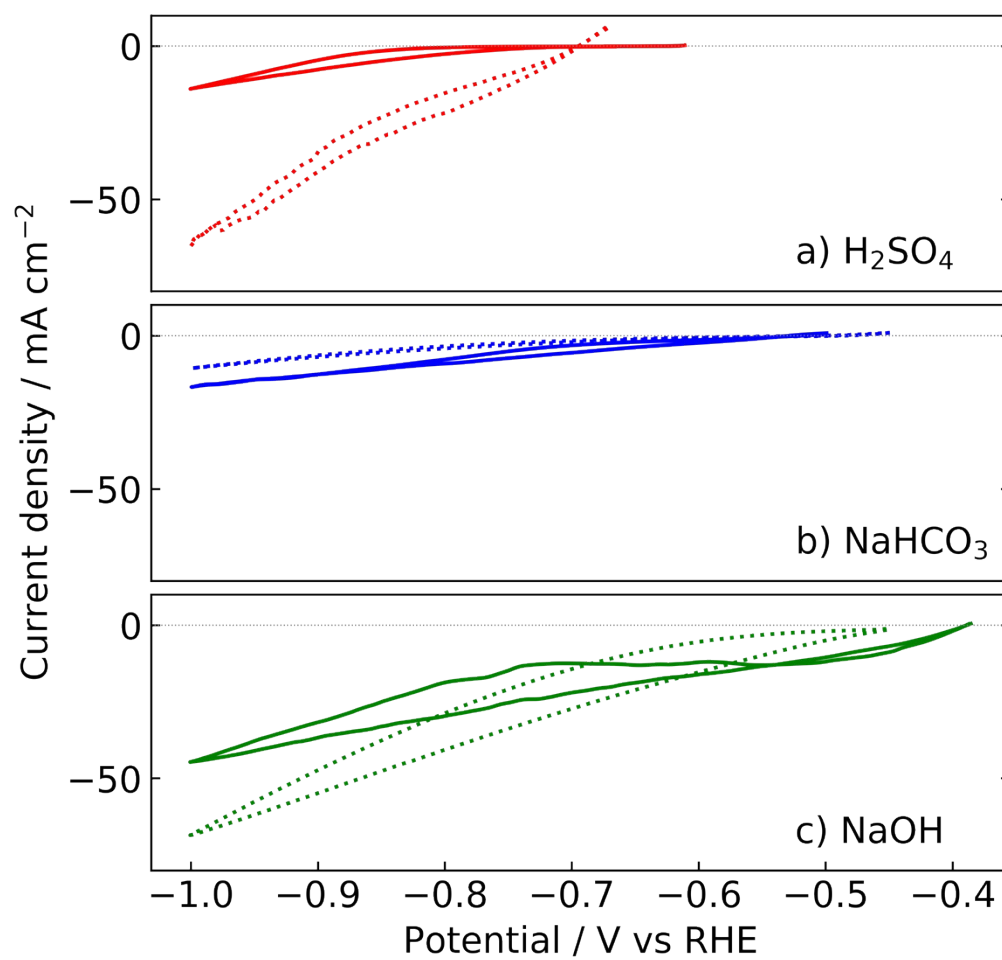

**Figure S3.** CV showing polarization curves obtained with zinc at different pH (dashed lines = No furfural, bold lines = 100 mM furfural)

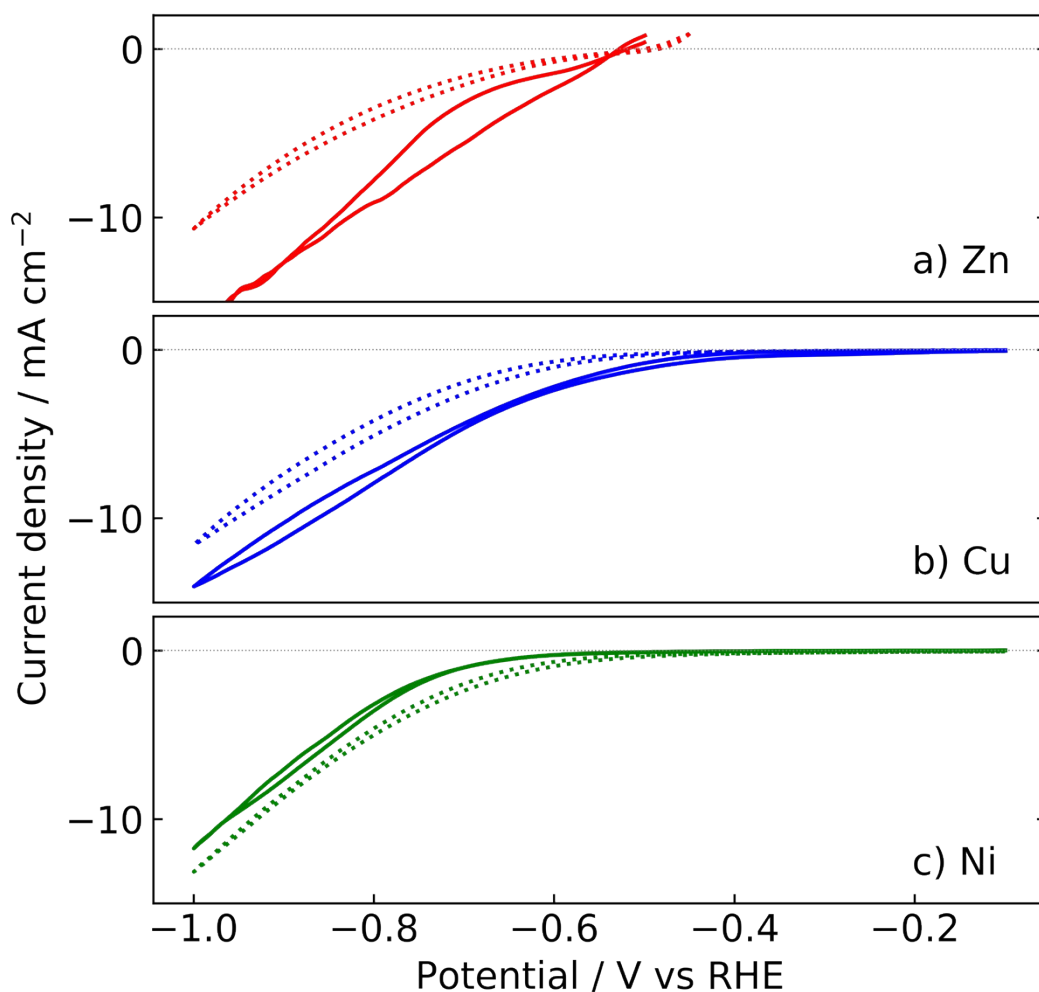

**Figure S4.** CV showing polarization curves obtained with different catalysts in 0.5 M NaHCO<sub>3</sub> (dashed lines = No furfural, bold lines = 100 mM furfural)

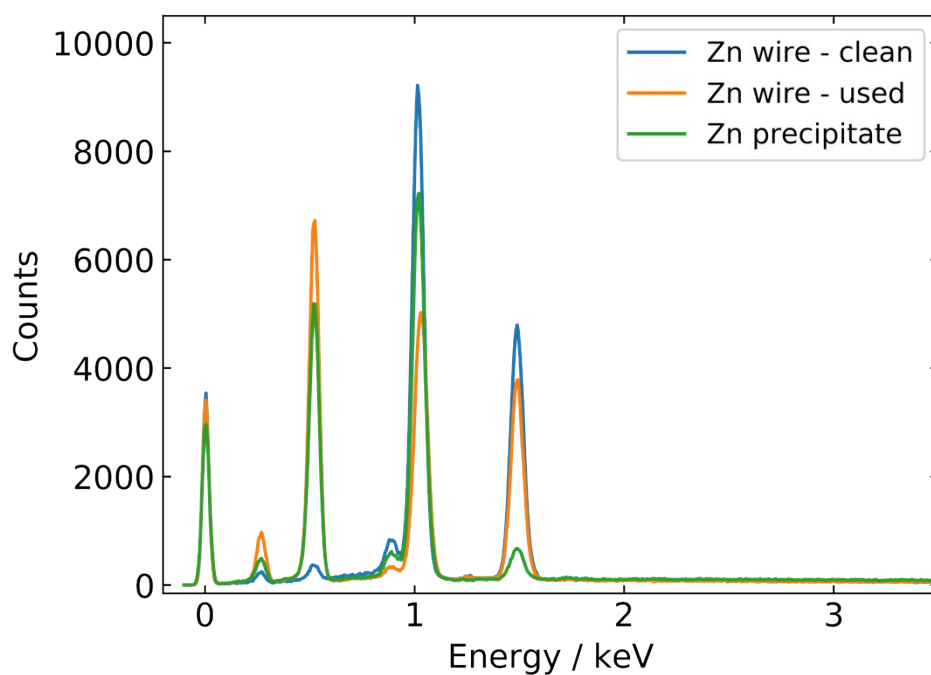

**Figure S5.** EDS spectra of the clean zinc wire, used zinc wire and zinc precipitates

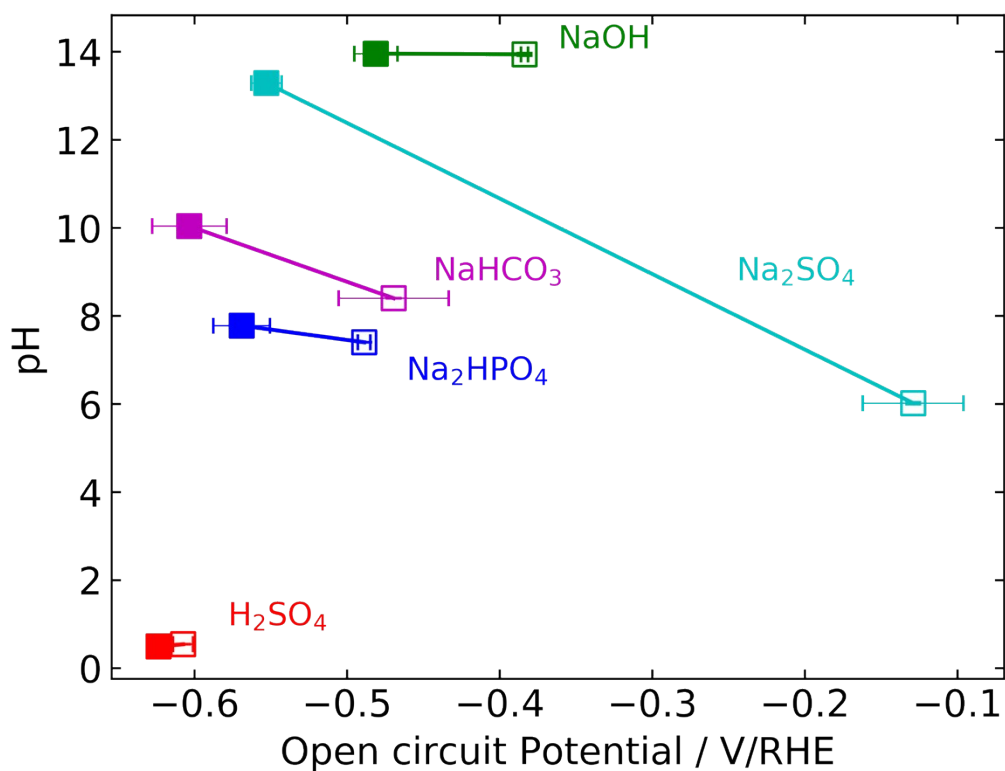

**Figure S6.** Change in electrolyte pH and Open Circuit potential during two-hour ECH electrolysis. Closed symbols: initial conditions; Open symbols: final conditions.

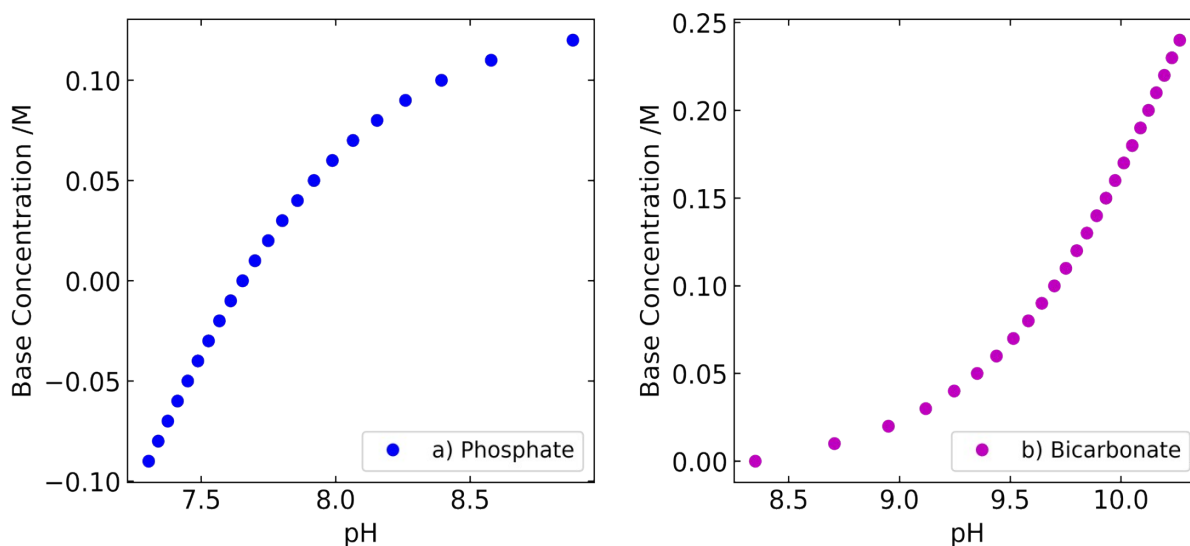

**Figure S7.** pH as a function of base concentration for a) Phosphate buffer b) Sodium bicarbonate buffer

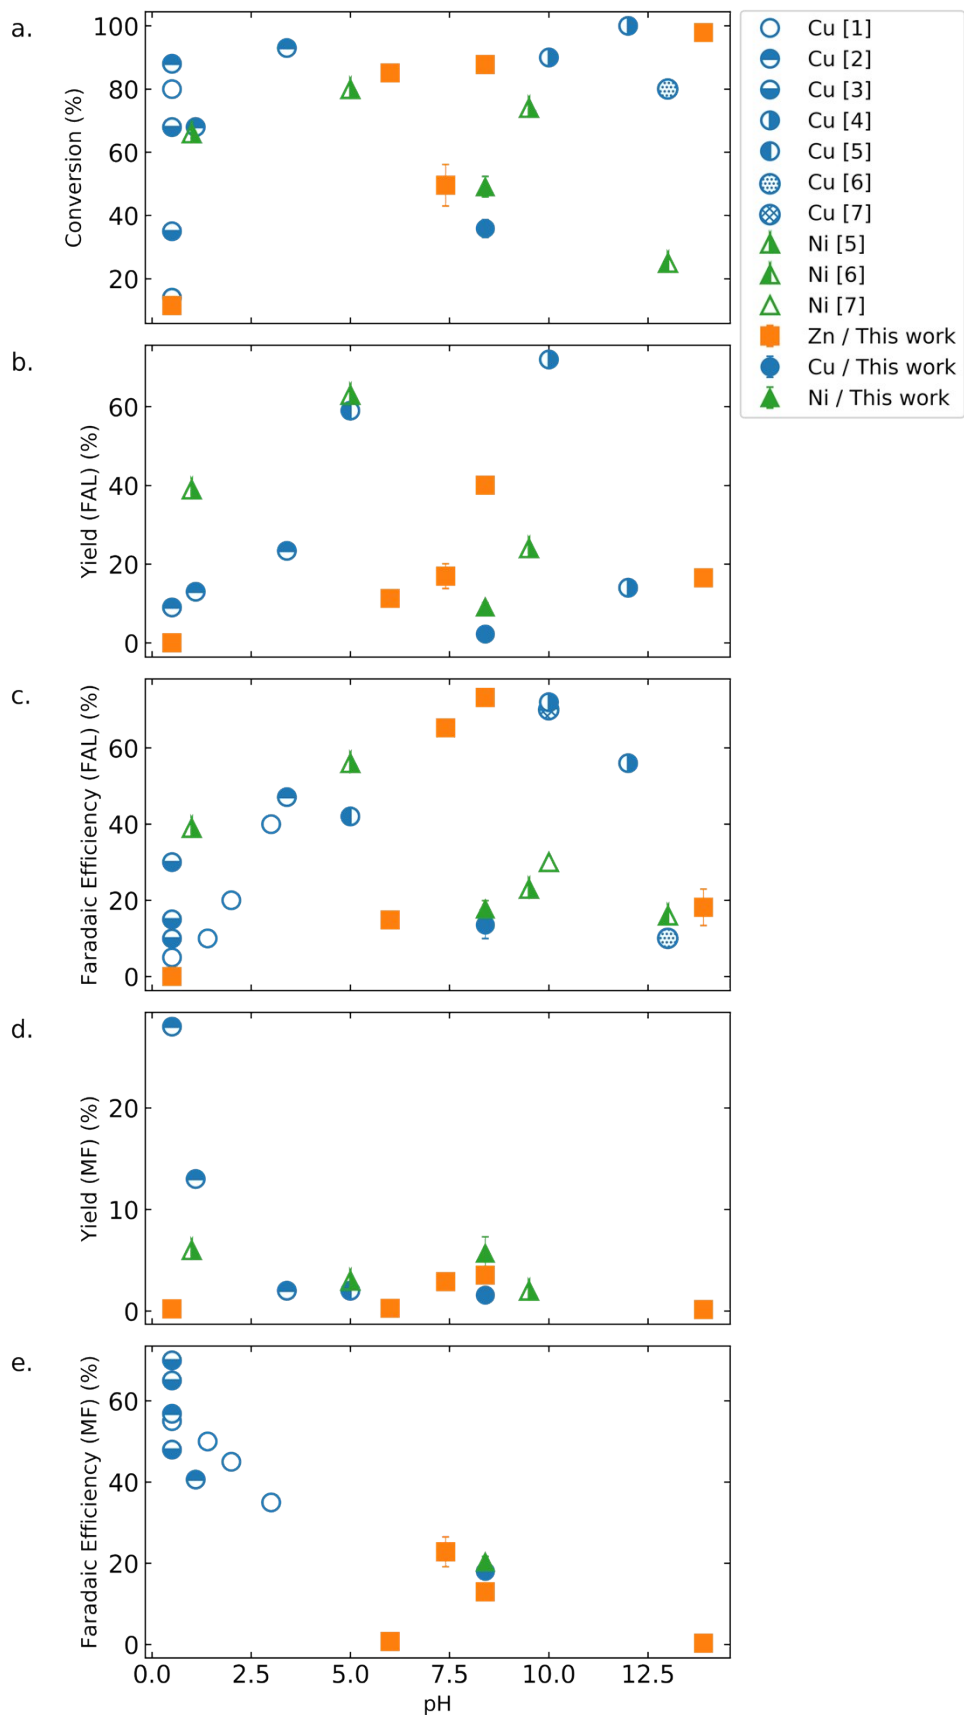

**Figure S8.** Variation of (a). Conversion of furfural, (b). Yield of FAL, (c). FE of FAL, (d). Yield of MF, (e). FE of MF with electrolyte pH (Literature vs this work)

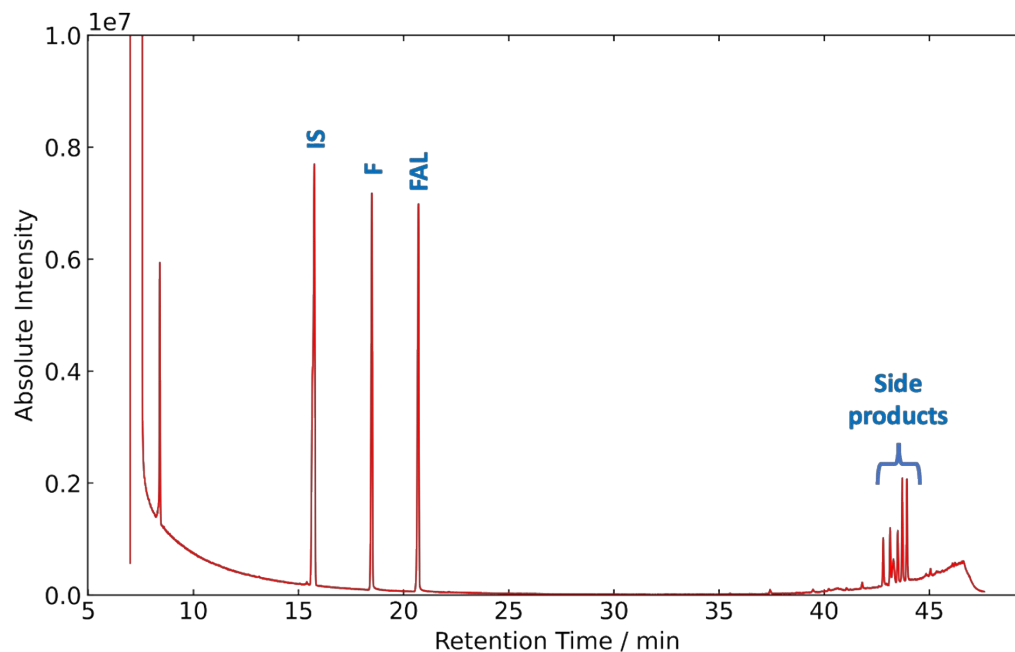

**Figure S9.** GC chromatogram of reaction mixture containing furfural (F); furfural alcohol (FAL), p-xylene (internal standard, IS) and side products (alpha-furoin (Ethanone,1,2-di-2-furanyl-2-hydroxy); hydrofuroin (1,2-Ethanediol, 1,2-di-2-furanyl-); 4-methyl-5-(2-methyl-2-propenyl)-2(5H)-furanone and 1-(2-furanyl)-3-methyl-butene-1,2-diol [cold trap sample containing MF not analyzed by GC-MS]).

**Table S1.** Similarity indices of probable chemical compounds at respective peak retention times in GC chromatogram [Fig. S9]

|                      |      | Similarity Index of Chemical Products |             |                                                 |                                        |
|----------------------|------|---------------------------------------|-------------|-------------------------------------------------|----------------------------------------|
|                      |      | alpha-furoin                          | Hydrofuroin | 4-methyl-5-(2-methyl-2-propenyl)-2(5H)-furanone | 1-(2-furanyl)-3-methyl-butene-1,2-diol |
| Retention Time / min | 42.8 | 87                                    | -           | 88                                              | 89                                     |
|                      | 43.1 | 87                                    | -           | 89                                              | -                                      |
|                      | 43.3 | 80                                    | -           | -                                               | -                                      |
|                      | 43.5 | 83                                    | 82          | -                                               | -                                      |
|                      | 43.7 | 82                                    | 84          | 85                                              | 82                                     |
|                      | 43.9 | 82                                    | 85          | 85                                              | -                                      |

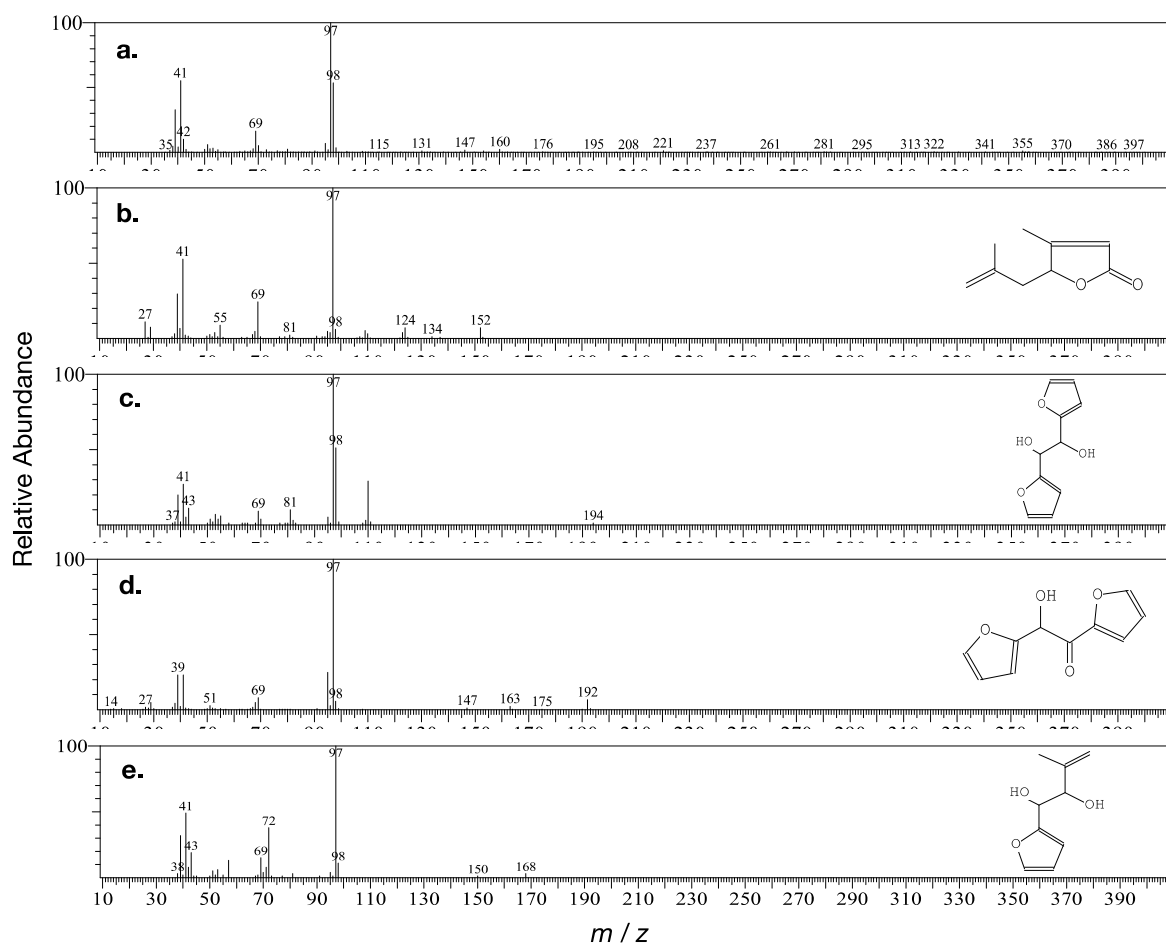

**Figure S10.** GC Mass spectra with probable chemical side products. (a) Mass spectrum of GC peak at 43.7 min retention time. Reference mass spectrum for (b) 4-methyl-5-(2-methyl-2-propenyl)-2(5H)-furanone; (c) hydrofuroin; (d) alpha-furoin; (e) 1-(2-furanyl)-3-methyl-butene-1,2-diol.



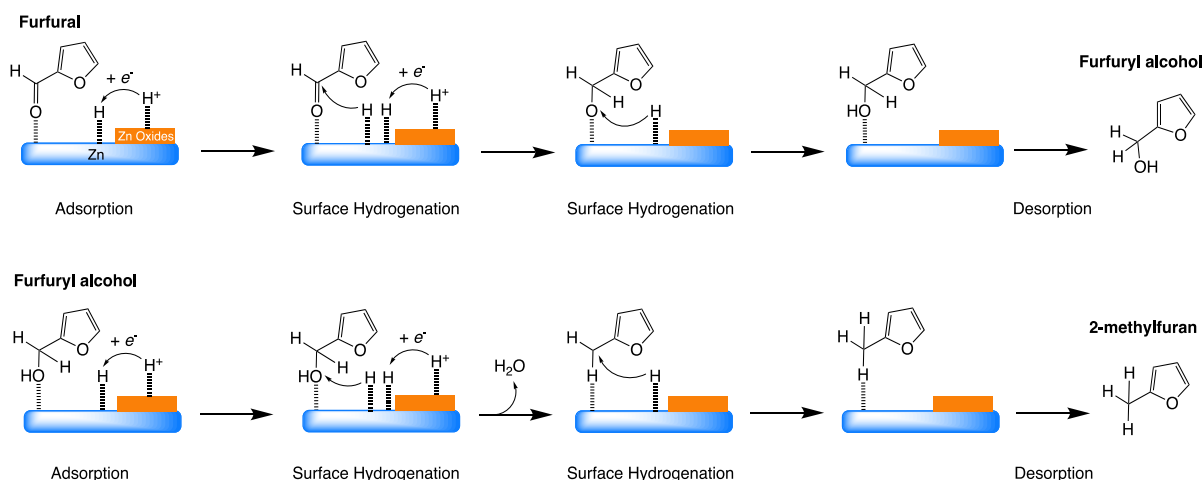

**Figure S11.** Proposed mechanism for ECH of furfural

## References

- [1] X.H. Chadderdon, D.J. Chadderdon, J.E. Matthiesen, Y. Qiu, J.M. Carraher, J.P. Tessonnickeler, W. Li, Mechanisms of Furfural Reduction on Catalyst Electrodes: Distinguishing Pathways for Selective Hydrogenation of Bioderived Oxygenates, *J. Am. Chem. Soc.* 139 (2017) 14120–14128. doi:10.1021/jacs.7b06331.
- [2] S. Jung, E.J. Biddinger, Electrocatalytic Hydrogenation and Hydrogenolysis of Furfural and the Impact of Homogeneous Side Reactions of Furanic Compounds in Acidic Electrolytes, *ACS Sustain. Chem. Eng.* 4 (2016) 6500–6508. doi:10.1021/acssuschemeng.6b01314.
- [3] S. Jung, A.N. Karaiskakis, E.J. Biddinger, Enhanced activity for electrochemical hydrogenation and hydrogenolysis of furfural to biofuel using electrodeposited Cu catalysts, *Catal. Today.* 323 (2019) 26–34. doi:10.1016/j.cattod.2018.09.011.
- [4] P. Parpot, A.P. Bettencourt, G. Chamoulaud, K.B. Kokoh, E.M. Belgsir, Electrochemical investigations of the oxidation-reduction of furfural in aqueous medium - Application to electrosynthesis, *Electrochim. Acta.* 49 (2004) 397–403. doi:10.1016/j.electacta.2003.08.021.
- [5] Z. Li, S. Kelkar, C.H. Lam, K. Luczek, J.E. Jackson, D.J. Miller, C.M. Saffron, Aqueous electrocatalytic hydrogenation of furfural using a sacrificial anode, *Electrochim. Acta.* 64 (2012) 87–93. doi:10.1016/j.electacta.2011.12.105.

[6] B. Zhao, M. Chen, Q. Guo, Y. Fu, Electrocatalytic hydrogenation of furfural to furfuryl alcohol using platinum supported on activated carbon fibers, *Electrochim. Acta.* 135 (2014) 139–146. doi:10.1016/j.electacta.2014.04.164.

[7] L. Liu, H. Liu, W. Huang, Y. He, W. Zhang, C. Wang, H. Lin, Mechanism and kinetics of the electrocatalytic hydrogenation of furfural to furfuryl alcohol, *J. Electroanal. Chem.* 804 (2017) 248–253. doi:10.1016/j.jelechem.2017.09.021.
